# Supplementary material for: Past ice-sheet behaviour: retreat scenarios and changing controls in the Ross Sea, Antarctica
Source: Copernicus journal article supplement (doi:10.5194/tc-10-1003-2016), 2016-05-13
Supplement: Supplementary file 1 [file tc-10-1003-2016-supplement.pdf]

Supplement of The Cryosphere, 10, 1003–1020, 2016  
<http://www.the-cryosphere.net/10/1003/2016/>  
doi:10.5194/tc-10-1003-2016-supplement  
© Author(s) 2016. CC Attribution 3.0 License.

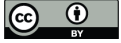

*Supplement of*

## **Past ice-sheet behaviour: retreat scenarios and changing controls in the Ross Sea, Antarctica**

**Anna Ruth W. Halberstadt et al.**

*Correspondence to:* Anna Ruth W. Halberstadt (ar.halberstadt@rice.edu)

The copyright of individual parts of the supplement might differ from the CC-BY 3.0 licence.

Supplementary Table 1. Multibeam dataset compilation. NBP1502 cruise data were used here with the permission of J.B. Anderson. The remaining Nathaniel B. Palmer (NBP) cruise data were accessed through the Lamont-Doherty Earth Observatory ([marine-geo.org](http://marine-geo.org)) and the Oden data are available at [oden.geo.su.se](http://oden.geo.su.se). Swedish Polar Research = SPR.

| <i>Cruise Number</i> | <i>Vessel</i> | <i>Multibeam System</i>  | <i>Date</i>             | <i>PI</i>                     |
|----------------------|---------------|--------------------------|-------------------------|-------------------------------|
| NBP9801              | NBP           | SeaBeam Instruments 2112 | 1/16/1998 - 2/18/1998   | J.B. Anderson                 |
| NBP9802              | NBP           | SeaBeam Instruments 2112 | 2/22/1998 - 4/2/1998    | S. Honjo                      |
| NBP9803              | NBP           | SeaBeam Instruments 2112 | 5/1/1998 - 6/17/1998    | M. Jeffries/D. Garrison       |
| NBP9807              | NBP           | SeaBeam Instruments 2112 | 11/1/1998 - 12/12/1998  | R. Dunbar                     |
| NBP9901              | NBP           | SeaBeam Instruments 2112 | 12/26/1998 - 2/4/1999   | M. Jeffries                   |
| NBP9902              | NBP           | SeaBeam Instruments 2112 | 2/12/1999 - 3/22/1999   | J.B. Anderson                 |
| NBP9909              | NBP           | SeaBeam Instruments 2112 | 12/20/1999 - 2/9/2000   | J. Bengtson                   |
| NBP0001              | NBP           | SeaBeam Instruments 2112 | 2/14/2000 - 3/30/2000   | S. Jacobs/T. Kellogg          |
| NBP0209              | NBP           | Kongsberg EM120          | 12/11/2002 - 12/30/2002 | S. Cande                      |
| NBP0301              | NBP           | Kongsberg EM120          | 1/5/2003 - 1/29/2003    | L. Bartek/B. Luyendyk         |
| NBP0301A             | NBP           | Kongsberg EM120          | 2/1/2003 - 2/18/2003    | P. Bart                       |
| NBP0301B             | NBP           | Kongsberg EM120          | 2/20/2003 - 2/22/2003   | W. Smith/V. Asper             |
| NBP0302              | NBP           | Kongsberg EM120          | 2/24/2003 - 4/4/2003    | A. Gordon                     |
| NBP0305A             | NBP           | Kongsberg EM120          | 12/20/2003 - 12/30/2003 | W. Smith                      |
| NBP0306              | NBP           | Kongsberg EM120          | 1/4/2004 - 1/15/2004    | B. Luyendyk/L. Bartek         |
| NBP0401              | NBP           | Kongsberg EM120          | 1/19/2004 - 2/17/2004   | T. Wilson                     |
| NBP0402              | NBP           | Kongsberg EM120          | 2/21/2004 - 4/6/2004    | M. Visbeck                    |
| NBP0408              | NBP           | Kongsberg EM120          | 10/12/2004 - 12/6/2004  | S. Jacobs                     |
| NBP0409              | NBP           | Kongsberg EM120          | 12/18/2004 - 1/21/2005  | R. Kiene/D. Kieber            |
| NBP0501              | NBP           | Kongsberg EM120          | 1/28/2005 - 2/13/2005   | A. Gordon                     |
| NBP0508              | NBP           | Kongsberg EM120          | 10/26/2005 - 12/3/2005  | P. Neale                      |
| NBP0601              | NBP           | Kongsberg EM120          | 12/17/2005 - 1/24/2006  | G. DiTullio                   |
| NBP0601A             | NBP           | Kongsberg EM120          | 1/30/2006 - 2/2/2006    | W. Smith                      |
| NBP0602              | NBP           | Kongsberg EM120          | 1/30/2006 - 2/21/2006   | J. Stock                      |
| NBP0608              | NBP           | Kongsberg EM120          | 11/3/2006 - 12/11/2006  | G. DiTullio                   |
| NBP0701              | NBP           | Kongsberg EM120          | 12/22/2006 - 1/28/2007  | S. Cande/P. Castillo          |
| NBP0702              | NBP           | Kongsberg EM120          | 2/2/2007 - 3/23/2007    | S. Jacobs                     |
| OSO0708              | <i>Oden</i>   | Kongsberg EM122          | 11/29/2007 - 1/7/2008   | SPR Secretariat               |
| NBP0801              | NBP           | Kongsberg EM120          | 1/9/2008 - 1/26/2008    | D. Caron/B. Huber             |
| NBP0802              | NBP           | Kongsberg EM120          | 1/30/2008 - 2/20/2008   | D. Caron/P. Bart              |
| NBP0803              | NBP           | Kongsberg EM120          | 2/22/2008 - 3/13/2008   | P. Bart                       |
| NBP1005A             | NBP           | Kongsberg EM120          | 1/13/2010 - 1/16/2011   | P. Yager                      |
| OSO0910              | <i>Oden</i>   | Kongsberg EM122          | 2/8/2010 - 3/12/2010    | M. Jakobsson/J.B. Anderson    |
| NBP1005              | NBP           | Kongsberg EM120          | 11/26/2010 - 1/16/2011  | P. Yager                      |
| OSO1011              | <i>Oden</i>   | Kongsberg EM122          | 12/8/2010 - 1/16/2011   | SPR Secretariat               |
| NBP1101              | NBP           | Kongsberg EM120          | 1/19/2011 - 2/15/2011   | J. Kohut/A. Kutska            |
| NBP1102              | NBP           | Kongsberg EM120          | 2/19/2011 - 4/23/2011   | J. Swift                      |
| NBP1201              | NBP           | Kongsberg EM120          | 12/24/2011 - 2/11/2012  | D. McGillicuddy               |
| NBP1202              | NBP           | Kongsberg EM120          | 2/11/2012 - 2/27/2012   | H. Owen                       |
| NBP1210              | NBP           | Kongsberg EM120          | 1/6/2013 - 2/9/2013     | K. Halanych                   |
| NBP1302              | NBP           | Kongsberg EM120          | 2/12/2013 - 4/5/2013    | D. Hansell/X. Yuan/G. Kooyman |
| NBP1310B             | NBP           | Kongsberg EM120          | 12/3/2013 - 1/23/2014   | K. Arrigo/R. Aronson          |
| NBP1502A             | NBP           | Kongsberg EM122          | 1/23/2015 - 3/20/2015   | J.B. Anderson                 |
